# Supplementary material for: Conformational heterogeneity of the BTK PHTH domain drives multiple regulatory states
Source: eLife. 2024 Jan 8;12:RP89489. doi: 10.7554/eLife.89489 (PMC10945472; doi:10.7554/eLife.89489)
Supplement: Supplementary file 1. [file elife-89489-supp1.xlsx]

## Sheet: Experimental Summary
	HDX Data: Summary and List of Experimental Parameters
	Data Set	Full length BTK				Replication
	HDX reaction details	Final D2O concentration=94.7%, pHread=7.60, 21 °C. See also footnote a						Number of replicates
	HDX time course	10s, 1m, 10m, 1h, 4h					Time point	Full length BTK
	HDX controls	2 undeuterated controls					undeuterated controls	2
	Back-exchange	30-35%					10 sec	2
	Number of peptides	170 followed; 214 identified					1 min	1
	Sequence coverage	93.7					10 min	2
	Average peptide length; Redundancy	13.8;3.78					1 hour	2
	Peptide filtering parameters	0.25 products/amino acid; 2 consecutive products					4 hours	2
	Replicates	See replication table →
	Repeatabilityb	+/- 0.25 relative Da
	Significant differences	> 0.5 Da
		a 18-fold dilution with labeling buffer [20 mM Tris pD 8.0, 150mM NaCl, 10% glycerol, 2% DMSO, 99.9% D2O].
		1:1 dilution with quench buffer [150 mM potassium phosphate, pH 2.4, H2O].
		c No statistical tests were applied to the HDX MS measurements. Rather, based on measurements of mean methodological error (+/- 0.14 Da; (Houde D, Berkowitz SA, Engen JR. J. Pharm. Sci. 2011;100(6):2071-2086.) we chose a value (+/- 0.25 Da) well above that as the threshold for calling differences in relative deuterium incorporation measurements meaningful. See also explanations of this methodolog…
		The following expanded experimental details were submitted with the PRIDE database deposition

## Sheet: Coverage map
	Sequence	Start	End	Length
	AAVILES	2	8	7
	IFLKRSQQKKKTSPLNF	9	25	17
	LKRSQQKKKTSPLNF	11	25	15
	LTVHKLSY	32	39	8
	LTVHKLSYYE	32	41	10
	TVHKLSY	33	39	7
	YEYDFERGRRGSKKGSIDVE	40	59	20
	FERGRRGSKKGSIDVE	44	59	16
	FERGRRGSKKGSIDVEKITC	44	63	20
	VEKITCVE	58	65	8
	VETVIPEKNPPPERQIPRRGEE	64	85	22
	VETVIPEKNPPPERQIPRRGEESSE	64	88	25
	VETVIPEKNPPPERQIPRRGEESSEM	64	89	26
	TVIPEKNPPPERQIPRRGEE	66	85	20
	TVIPEKNPPPERQIPRRGEESSE	66	88	23
	TVIPEKNPPPERQIPRRGEESSEM	66	89	24
	IERFPYPFQ	95	103	9
	VVYDEGPLYVFSPTEE	104	119	16
	VIRYNSDL	131	138	8
	VQKYHPCF	139	146	8
	QKYHPCF	140	146	7
	WIDGQYL	147	153	7
	LCCSQTAKNAMGCQ	153	166	14
	CCSQTAKNAMGCQ	154	166	13
	SQTAKNAMGC	156	165	10
	SQTAKNAMGCQ	156	166	11
	SQTAKNAMGCQIL	156	168	13
	ILENRNGSLKPGSS	167	180	14
	ILENRNGSLKPGSSHRKTKKPLPPTPEE	167	194	28
	DQILKKPLPPEPTAAPIST	195	213	19
	DQILKKPLPPEPTAAPISTTE	195	215	21
	DQILKKPLPPEPTAAPISTTEL	195	216	22
	QILKKPLPPEPTAAPIST	196	213	18
	QILKKPLPPEPTAAPISTTE	196	215	20
	ILKKPLPPEPTAAPIST	197	213	17
	TELKKVVAL	214	222	9
	LKKVVAL	216	222	7
	YDYMPMNA	223	230	8
	YDYMPMNAND	223	232	10
	LQLRKGEE	233	240	8
	LQLRKGEEY	233	241	9
	LQLRKGEEYF	233	242	10
	QLRKGEEY	234	241	8
	RKGEEYF	236	242	7
	ILEESNLPWWRARDKNGQEGYIPSN	243	267	25
	ILEESNLPWWRARDKNGQEGYIPSNY	243	268	26
	EESNLPWWRARDKNGQEGYIPSN	245	267	23
	EESNLPWWRARDKNGQEGYIPSNY	245	268	24
	ESNLPWWRARDKNGQEGYIPSNY	246	268	23
	AEDSIEM	272	278	7
	YEWYSKHMTRSQAEQL	279	294	16
	WYSKHMTRSQAEQL	281	294	14
	YSKHMTRSQAEQL	282	294	13
	YSKHMTRSQAEQLL	282	295	14
	LLKQEGKEGGF	294	304	11
	LKQEGKEGGF	295	304	10
	IVRDSSKAGKYTVSV	305	319	15
	IVRDSSKAGKYTVSVF	305	320	16
	FAKSTGEPQGVIRH	320	333	14
	FAKSTGEPQGVIRHYVV	320	336	17
	FAKSTGEPQGVIRHYVVC	320	337	18
	FAKSTGEPQGVIRHYVVCSTPQSQY	320	344	25
	AKSTGEPQGVIRHYVVCSTPQSQ	321	343	23
	AKSTGEPQGVIRHYVVCSTPQSQY	321	344	24
	YVVCSTPQSQY	334	344	11
	YYLAEKHLFSTIPEL	344	358	15
	YLAEKHL	345	351	7
	YLAEKHLFSTIPEL	345	358	14
	LAEKHLFSTIPEL	346	358	13
	LAEKHLFSTIPELINYHQHNSAG	346	368	23
	TIPELINYHQHNSAGLISRLKY	354	375	22
	INYHQHNSAGL	359	369	11
	NYHQHNSAGL	360	369	10
	HQHNSAGL	362	369	8
	ISRLKYPVSKQNKNAPSTAGL	370	390	21
	ISRLKYPVSKQNKNAPSTAGLG	370	391	22
	ISRLKYPVSKQNKNAPSTAGLGYGSW	370	395	26
	EIDPKDLTF	396	404	9
	EIDPKDLTFL	396	405	10
	FLKELGTGQF	404	413	10
	LKELGTGQF	405	413	9
	LKELGTGQFGVVKYGKWRGQY	405	425	21
	KELGTGQF	406	413	8
	GVVKYGKWRGQY	414	425	12
	GVVKYGKWRGQYDVA	414	428	15
	VKYGKWRGQY	416	425	10
	IREGSMSE	432	439	8
	IREGSMSEDE	432	441	10
	IREGSMSEDEF	432	442	11
	IEEAKVMMNLSHEKL	443	457	15
	AKVMMNLSHEKL	446	457	12
	KVMMNLSHEKL	447	457	11
	NLSHEKL	451	457	7
	YGVCTKQRPIF	461	471	11
	GVCTKQRPIF	462	471	10
	TKQRPIF	465	471	7
	YMANGCL	476	482	7
	LNYLREMRHRFQTQQL	483	498	16
	LREMRHRFQTQQL	486	498	13
	MRHRFQTQQL	489	498	10
	CKDVCEAM	502	509	8
	MEYLESKQFL	509	518	10
	EYLESKQFL	510	518	9
	YLESKQFL	511	518	8
	YLESKQFLHRDLAARNCL	511	528	18
	ESKQFLHRDLAARNCL	513	528	16
	LHRDLAARNC	518	527	10
	RNCLVNDQGVVKVSDF	525	540	16
	RNCLVNDQGVVKVSDFGL	525	542	18
	CLVNDQGVVKVSD	527	539	13
	CLVNDQGVVKVSDF	527	540	14
	VNDQGVVKVSD	529	539	11
	VNDQGVVKVSDF	529	540	12
	VNDQGVVKVSDFGL	529	542	14
	VNDQGVVKVSDFGLSR	529	544	16
	VNDQGVVKVSDFGLSRY	529	545	17
	VNDQGVVKVSDFGLSRYVL	529	547	19
	VNDQGVVKVSDFGLSRYVLDD	529	549	21
	VNDQGVVKVSDFGLSRYVLDDE	529	550	22
	FGLSRYVL	540	547	8
	FGLSRYVLDD	540	549	10
	FGLSRYVLDDE	540	550	11
	GLSRYVL	541	547	7
	GLSRYVLDD	541	549	9
	GLSRYVLDDE	541	550	10
	SRYVLDD	543	549	7
	SRYVLDDE	543	550	8
	EYTSSVGSKF	550	559	10
	EYTSSVGSKFPVRWSPPEVL	550	569	20
	EYTSSVGSKFPVRWSPPEVLM	550	570	21
	YTSSVGSKFPVRWSPPEVL	551	569	19
	YTSSVGSKFPVRWSPPEVLM	551	570	20
	PVRWSPPEVL	560	569	10
	MYSKFSSKSDIWA	570	582	13
	MYSKFSSKSDIWAF	570	583	14
	YSKFSSKSDIWA	571	582	12
	YSKFSSKSDIWAF	571	583	13
	SSKSDIWA	575	582	8
	SSKSDIWAF	575	583	9
	MWEIYSL	587	593	7
	MWEIYSLGKMPYERF	587	601	15
	MWEIYSLGKMPYERFTNSE	587	605	19
	WEIYSLGKM	588	596	9
	WEIYSLGKMPYE	588	599	12
	WEIYSLGKMPYERF	588	601	14
	WEIYSLGKMPYERFTNS	588	604	17
	WEIYSLGKMPYERFTNSE	588	605	18
	WEIYSLGKMPYERFTNSETAE	588	608	21
	GKMPYERF	594	601	8
	GKMPYERFTNSE	594	605	12
	GKMPYERFTNSETAE	594	608	15
	TAEHIAQGLRLPRPHL	606	621	16
	TAEHIAQGLRLPRPHLAS	606	623	18
	TAEHIAQGLRLPRPHLASE	606	624	19
	AEHIAQGLRLPRPHLAS	607	623	17
	HIAQGLRLPRPHL	609	621	13
	HIAQGLRLPRPHLAS	609	623	15
	HIAQGLRLPRPHLASE	609	624	16
	LRLPRPHLAS	614	623	10
	LRLPRPHLASE	614	624	11
	ERVYTIM	624	630	7
	YSCWHEKADERPSF	631	644	14
	SCWHEKADERPSF	632	644	13
	WHEKADERPSF	634	644	11
	HEKADERPSF	635	644	10
	KILLSNIL	645	652	8
	KILLSNILDV	645	654	10
	DVMDEESHHHHHH	653	665	13
	MDEESHHHHHH	655	665	11
	DEESHHHHHH	656	665	10
				13.8353	Average length

## Sheet: All HDX Data
								10 sec					1 min					10 min					1 hour					4 hours
			Sequence	Start	End	Num Exchangers		Relative Uptake	Relative Uptake SD	Rel Fract Uptake	Rel Fract Uptake SD		Relative Uptake	Relative Uptake SD	Rel Fract Uptake	Rel Fract Uptake SD		Relative Uptake	Relative Uptake SD	Rel Fract Uptake	Rel Fract Uptake SD		Relative Uptake	Relative Uptake SD	Rel Fract Uptake	Rel Fract Uptake SD		Relative Uptake	Relative Uptake SD	Rel Fract Uptake	Rel Fract Uptake SD
			AAVILES	2	8	6		1.45856	0.047003	24.3093	0.783383		2.30353	0.008663	38.3922	0.14439		3.29736	0.024579	54.956	0.409645		3.73673	0.043828	62.2788	0.730469		3.93248	0.057554	65.5413	0.959234
			IFLKRSQQKKKTSPLNF	9	25	15		6.24079	0.049468	41.6053	0.329785		6.34748	0.006763	42.3165	0.045084		6.35009	0.041844	42.334	0.278957		6.41701	0.058552	42.78	0.390346		6.53838	0.049767	43.5892	0.331778
			LKRSQQKKKTSPLNF	11	25	13		6.40873	0.070622	49.2979	0.543248		6.66777	0.000518	51.2905	0.003983		6.6158	0.079961	50.8908	0.615085		6.60298	0.018557	50.7922	0.142745		6.62588	0.031602	50.9683	0.243089
			LTVHKLSY	32	39	7		0.380606	0.03293	5.43723	0.470435		0.872937	0.018485	12.4705	0.264077		1.25968	0.041952	17.9954	0.599319		1.29116	0.060511	18.4451	0.864441		1.46023	0.021594	20.8605	0.308483
			LTVHKLSYYE	32	41	9		0.497281	0.065785	5.52534	0.730941		1.23135	0.038997	13.6816	0.433301		2.09518	0.039265	23.2798	0.436275		2.58139	0.059375	28.6821	0.659722		2.65821	0.132785	29.5356	1.47539
			TVHKLSY	33	39	6		0.409163	0.052222	6.81938	0.870366		0.805925	0.000307	13.4321	0.005125		1.23652	0.037804	20.6086	0.630065		1.21233	0.060138	20.2055	1.0023		1.39506	0.038651	23.2511	0.644178
			YEYDFERGRRGSKKGSIDVE	40	59	19		4.71031	0.108116	24.7911	0.56903		6.69618	0.01885	35.2431	0.099212		7.79356	0.298815	41.0187	1.57271		8.25528	0.086658	43.4488	0.456096		8.36528	0.198854	44.0278	1.0466
			FERGRRGSKKGSIDVE	44	59	15		3.77268	0.076551	25.1512	0.51034		5.69304	0.007949	37.9536	0.052996		6.75997	0.010542	45.0665	0.070281		7.02275	0.054287	46.8183	0.361914		7.01873	0.013766	46.7916	0.091772
			FERGRRGSKKGSIDVEKITC	44	63	19		3.15861	0.065195	16.6242	0.34313		4.9786	0.060218	26.2032	0.316939		5.70674	0.062796	30.0355	0.330506		6.4864	0.17822	34.139	0.938002		6.81184	0.104672	35.8518	0.550908
			VEKITCVE	58	65	7		0.049234	0.03417	0.70334	0.488138		0.328873	0.000723	4.69819	0.010325		0.831445	0.053087	11.8778	0.75838		0.969629	0.032323	13.8518	0.461764		1.52324	0.025749	21.7605	0.367843
			VETVIPEKNPPPERQIPRRGEE	64	85	16		7.9587	0.061117	49.7419	0.381983		9.22588	0.01112	57.6618	0.069502		9.61454	0.011402	60.0909	0.071264		10.224	0.058716	63.9001	0.366975		10.6242	0.0245	66.401	0.153124
			VETVIPEKNPPPERQIPRRGEESSE	64	88	19		9.28483	0.048441	48.8675	0.254953		10.5384	0.02632	55.4655	0.138529		10.9602	0.029954	57.6853	0.157652		11.4841	0.084517	60.4429	0.444825		11.9483	0.026322	62.8858	0.138539
			VETVIPEKNPPPERQIPRRGEESSEM	64	89	20		9.78628	0.078681	48.9314	0.393403		10.8623	0.03271	54.3117	0.16355		11.3731	0.037635	56.8653	0.188175		11.8283	0.078141	59.1416	0.390705		12.3447	0.114057	61.7233	0.570286
			TVIPEKNPPPERQIPRRGEE	66	85	14		7.75443	0.057786	55.3888	0.412759		8.51808	0.028828	60.8434	0.205914		8.65803	0.047897	61.8431	0.342125		9.18272	0.040238	65.5908	0.287415		9.49353	0.038328	67.8109	0.273771
			TVIPEKNPPPERQIPRRGEESSE	66	88	17		9.00711	0.02163	52.983	0.127233		9.97316	0.018497	58.6656	0.108804		10.1876	0.020002	59.927	0.117659		10.6508	0.036629	62.6518	0.215467		11.0534	0.060668	65.0201	0.356873
			TVIPEKNPPPERQIPRRGEESSEM	66	89	18		9.5066	0.042672	52.8145	0.237065		10.4236	0.00567	57.9089	0.031502		10.6045	0.028768	58.914	0.15982		10.9477	0.007189	60.8205	0.039942		11.2197	0.011791	62.3319	0.065508
			IERFPYPFQ	95	103	6		0.801469	0.068397	13.3578	1.13995		1.13302	0.00091	18.8836	0.015167		1.12906	0.084788	18.8177	1.41313		1.08081	0.065496	18.0136	1.0916		1.23729	0.033059	20.6215	0.55099
			VVYDEGPLYVFSPTEE	104	119	13		2.17657	0.010465	16.7428	0.080502		2.99196	0.004768	23.0151	0.036681		4.36218	0.053848	33.5552	0.414213		5.06271	0.019504	38.9439	0.150031		5.24829	0.080124	40.3714	0.61634
			VIRYNSDL	131	138	7		3.43593	0.089657	49.0848	1.28081		3.77001	0.071361	53.8573	1.01944		4.32545	0.087993	61.7922	1.25704		4.32214	0.089314	61.7448	1.27591		4.39931	0.087974	62.8473	1.25677
			VQKYHPCF	139	146	6		0.200326	0.08118	3.33876	1.35299		0.38612	0.023596	6.43534	0.393259		0.564919	0.024372	9.41532	0.406208		0.958725	0.037696	15.9787	0.628266		1.62449	0.027547	27.0749	0.459112
			QKYHPCF	140	146	5		0.184396	0.045366	3.68792	0.907316		0.448999	0.020011	8.97998	0.40023		0.592988	0.048655	11.8598	0.973095		1.00889	0.026597	20.1778	0.53193		1.63696	0.027232	32.7392	0.544634
			WIDGQYL	147	153	6		0.797438	0.034257	13.2906	0.570946		1.20735	0.007946	20.1226	0.132434		1.4433	0.016806	24.0549	0.2801		2.29653	0.065361	38.2754	1.08936		2.73929	0.027481	45.6548	0.458019
			LCCSQTAKNAMGCQ	153	166	13		4.59002	0.202043	35.3079	1.55418		6.19812	0.196478	47.6778	1.51137		6.8877	0.205839	52.9823	1.58337		7.35226	0.199419	56.5559	1.53399		7.88328	0.197476	60.6406	1.51904
			CCSQTAKNAMGCQ	154	166	12		4.55382	0.062971	37.9485	0.524755		5.73581	0.023144	47.7984	0.192865		6.69378	0.023144	55.7815	0.192865		7.01555	0.05271	58.4629	0.439248		7.40332	0.045452	61.6944	0.378765
			SQTAKNAMGC	156	165	9		4.13516	0.024442	45.9462	0.271577		5.18141	0.017193	57.5712	0.191038		5.72024	0.017769	63.5582	0.197432		5.78258	0.030058	64.2509	0.333975		5.74818	0.051019	63.8687	0.566877
			SQTAKNAMGCQ	156	166	10		3.65148	0.067981	36.5148	0.679808		4.69493	0.019251	46.9493	0.192514		5.26286	0.032423	52.6285	0.324228		5.38702	0.019769	53.8702	0.197687		5.7999	0.039506	57.999	0.395058
			SQTAKNAMGCQIL	156	168	12		4.56587	0.023344	38.0489	0.19453		5.87248	0.013896	48.9373	0.115796		6.92002	0.068475	57.6668	0.570626		7.16467	0.016605	59.7056	0.138376		7.54969	0.075854	62.9141	0.632114
			ILENRNGSLKPGSS	167	180	12		7.6786	0.089501	63.9883	0.745839		7.72036	0.030647	64.3363	0.25539		7.74065	0.058505	64.5054	0.48754		7.79829	0.031232	64.9858	0.260266		7.75227	0.089602	64.6023	0.746681
			ILENRNGSLKPGSSHRKTKKPLPPTPEE	167	194	22		10.8371	0.170457	49.2597	0.774804		10.9058	0.048804	49.5718	0.221834		10.8554	0.053176	49.343	0.241711		11.1901	0.075783	50.8643	0.344469		10.8887	0.073576	49.4939	0.334434
			DQILKKPLPPEPTAAPIST	195	213	13		9.67445	0.008385	74.4188	0.064502		9.66575	0.004064	74.3519	0.031265		9.75044	0.025062	75.0034	0.192783		9.87487	0.031495	75.9605	0.242267		9.78959	0.022649	75.3045	0.174224
			DQILKKPLPPEPTAAPISTTE	195	215	15		10.9171	0.047483	72.7804	0.31655		10.9119	0.003719	72.7462	0.024793		10.9915	0.041729	73.2764	0.278197		11.0166	0.054727	73.4438	0.364847		11.0867	0.02628	73.9112	0.175201
			DQILKKPLPPEPTAAPISTTEL	195	216	16		11.7691	0.044605	73.5567	0.278781		11.7722	0.033846	73.5762	0.211539		11.8802	0.035564	74.2511	0.222274		11.7763	0.077898	73.6019	0.486865		11.9202	0.034135	74.5013	0.213342
			QILKKPLPPEPTAAPIST	196	213	12		8.57898	0.232064	71.4915	1.93386		8.67834	0.170566	72.3195	1.42139		8.69748	0.17385	72.479	1.44875		8.76932	0.169584	73.0776	1.4132		8.77783	0.171815	73.1486	1.43179
			QILKKPLPPEPTAAPISTTE	196	215	14		10.1511	0.025275	72.5082	0.180537		10.151	0.023303	72.5068	0.166447		10.2529	0.038416	73.2352	0.274401		10.2933	0.042726	73.5235	0.305186		10.3088	0.023303	73.634	0.166447
			ILKKPLPPEPTAAPIST	197	213	11		7.92819	0.049581	72.0744	0.450741		7.88887	0.010016	71.717	0.091052		7.94649	0.013502	72.2409	0.122749		8.07492	0.026254	73.4084	0.23867		7.9495	0.010136	72.2682	0.092147
			TELKKVVAL	214	222	8		1.10402	0.037586	13.8002	0.469827		1.99654	0.028612	24.9567	0.357653		2.56321	0.038285	32.0401	0.478566		3.69243	0.092902	46.1554	1.16127		5.11609	0.05129	63.9512	0.641129
			LKKVVAL	216	222	6		0.034223	0.04004	0.570387	0.667331		0.326702	0.002915	5.44503	0.048577		0.814831	0.037706	13.5805	0.628434		1.70057	0.064288	28.3428	1.07146		3.01228	0.055684	50.2047	0.928073
			YDYMPMNA	223	230	6		2.24724	0.053192	37.4539	0.886539		2.93073	0.01061	48.8456	0.176832		3.09412	0.017022	51.5686	0.283692		3.3028	0.011076	55.0467	0.1846		3.63943	0.052837	60.6571	0.880612
			YDYMPMNAND	223	232	8		2.89688	0.037016	36.211	0.462704		3.67083	0.007748	45.8854	0.096854		3.97872	0.018856	49.734	0.235696		4.45211	0.008199	55.6513	0.102489		4.77499	0.062321	59.6874	0.779013
			LQLRKGEE	233	240	7		0.253089	0.082879	3.61556	1.18399		0.314957	0.034653	4.49939	0.495046		1.29766	0.061317	18.538	0.875954		2.95942	0.051181	42.2774	0.731156		4.30044	0.036697	61.4348	0.524245
			LQLRKGEEY	233	241	8		0.222955	0.050662	2.78694	0.633276		0.357283	0.006904	4.46604	0.086294		1.2224	0.046	15.2799	0.575001		2.6853	0.075348	33.5662	0.941844		4.08913	0.054178	51.1141	0.67722
			LQLRKGEEYF	233	242	9		0.057836	0.052048	0.642626	0.578306		0.110893	0.006392	1.23215	0.071022		1.09587	0.018671	12.1763	0.20746		2.77881	0.060772	30.8757	0.675247		4.6826	0.008902	52.0289	0.098909
			QLRKGEEY	234	241	7		0.21146	0.103134	3.02086	1.47334		0.26346	0.004449	3.76371	0.063553		1.10208	0.095634	15.744	1.3662		2.67465	0.050893	38.2093	0.727037		4.20072	0.032903	60.0103	0.470045
			RKGEEYF	236	242	6		0.126011	0.010882	2.10019	0.181371		0.187475	0.007391	3.12459	0.123187		0.765307	0.018594	12.7551	0.309898		1.6639	0.103798	27.7317	1.72997		2.64849	0.025431	44.1415	0.423848
			ILEESNLPWWRARDKNGQEGYIPSN	243	267	22		3.86155	0.030762	17.5525	0.139826		5.23042	0.02797	23.7746	0.127136		7.53337	0.078769	34.2426	0.358043		10.7004	0.098726	48.6381	0.448754		12.4621	0.06841	56.646	0.310954
			ILEESNLPWWRARDKNGQEGYIPSNY	243	268	23		3.48937	0.032144	15.1712	0.139755		4.75789	0.02886	20.6865	0.12548		7.35667	0.040496	31.9855	0.176071		10.7319	0.050424	46.6606	0.219236		12.6794	0.049732	55.1278	0.216226
			EESNLPWWRARDKNGQEGYIPSN	245	267	20		2.94167	0.024456	14.7083	0.12228		4.13994	0.008504	20.6997	0.042522		6.38921	0.021066	31.9461	0.105328		9.23872	0.065249	46.1936	0.326245		11.1241	0.008563	55.6205	0.042817
			EESNLPWWRARDKNGQEGYIPSNY	245	268	21		2.85274	0.017483	13.5845	0.083251		4.04709	0.0108	19.2719	0.051431		6.3766	0.019259	30.3648	0.091709		9.7859	0.059708	46.5995	0.284323		11.7099	0.013406	55.7614	0.063839
			ESNLPWWRARDKNGQEGYIPSNY	246	268	20		2.33187	0.035476	11.6594	0.177381		3.55968	0.017623	17.7984	0.088115		5.78711	0.114419	28.9355	0.572096		9.27538	0.032204	46.3769	0.161019		11.1797	0.042083	55.8987	0.210416
			AEDSIEM	272	278	6		2.28948	0.021233	38.158	0.353878		2.79636	0.015164	46.606	0.252732		3.20405	0.018477	53.4008	0.307951		3.20064	0.040519	53.3439	0.675318		3.18701	0.016886	53.1169	0.281436
			YEWYSKHMTRSQAEQL	279	294	15		2.47408	0.039554	16.4939	0.263696		3.37337	0.024172	22.4891	0.161147		4.92678	0.047905	32.8452	0.31937		6.61585	0.042919	44.1057	0.286127		7.88175	0.04951	52.545	0.330068
			WYSKHMTRSQAEQL	281	294	13		2.88494	0.024206	22.1919	0.186199		3.56666	0.01848	27.4359	0.142157		4.07666	0.027551	31.3589	0.211931		5.59725	0.059366	43.0557	0.456662		6.86871	0.051258	52.8362	0.394294
			YSKHMTRSQAEQL	282	294	12		2.86961	0.052925	23.9134	0.441041		3.45511	0.039911	28.7926	0.332593		3.72935	0.091893	31.0779	0.765779		5.16368	0.056792	43.0306	0.47327		6.52468	0.065286	54.3723	0.544052
			YSKHMTRSQAEQLL	282	295	13		3.02045	0.029705	23.2342	0.228501		3.76118	0.008311	28.9321	0.063927		4.11279	0.020013	31.6369	0.153948		5.71438	0.011312	43.9568	0.087016		7.32162	0.009262	56.3202	0.071246
			LLKQEGKEGGF	294	304	10		1.54492	0.099109	15.4492	0.991086		2.24523	0.031338	22.4523	0.313383		3.60352	0.051421	36.0352	0.514211		5.04367	0.124317	50.4367	1.24317		5.74165	0.035886	57.4165	0.358856
			LKQEGKEGGF	295	304	9		1.35041	0.043641	15.0045	0.484905		1.90057	0.004481	21.1174	0.049792		3.35274	0.066793	37.2527	0.742146		4.38224	0.138715	48.6916	1.54128		4.79806	0.078049	53.3118	0.867206
			IVRDSSKAGKYTVSV	305	319	14		3.91531	0.041676	27.9665	0.297684		4.50527	0.028494	32.1805	0.203527		5.17392	0.059712	36.9566	0.426514		6.93104	0.07838	49.5074	0.559859		8.38585	0.032877	59.899	0.234832
			IVRDSSKAGKYTVSVF	305	320	15		3.45023	0.175877	23.0015	1.17252		4.03151	0.171235	26.8768	1.14156		4.67614	0.207454	31.1742	1.38302		6.66574	0.203304	44.4383	1.35536		8.25638	0.179442	55.0426	1.19628
			FAKSTGEPQGVIRH	320	333	12		5.34459	0.028773	44.5382	0.239772		6.09179	0.002223	50.7649	0.018527		6.88663	0.003868	57.3886	0.032232		7.1684	0.084192	59.7366	0.701601		7.46372	0.004874	62.1976	0.040619
			FAKSTGEPQGVIRHYVV	320	336	15		5.32344	0.041004	35.4896	0.273358		6.25283	0.00036	41.6855	0.002402		7.10646	0.003349	47.3764	0.022328		7.93305	0.002011	52.887	0.013406		8.86221	0.011997	59.0814	0.079979
			FAKSTGEPQGVIRHYVVC	320	337	16		5.26127	0.050927	32.883	0.318295		6.28474	0.010222	39.2797	0.063889		7.13622	0.105492	44.6014	0.659323		8.44062	0.018566	52.7539	0.116037		9.55753	0.014608	59.7346	0.091301
			FAKSTGEPQGVIRHYVVCSTPQSQY	320	344	22		6.90832	0.151768	31.4015	0.689855		8.75653	0.047501	39.8024	0.215912		10.6353	0.067149	48.3424	0.305221		12.6632	0.070964	57.5599	0.322564		13.9007	0.05213	63.1849	0.236956
			AKSTGEPQGVIRHYVVCSTPQSQ	321	343	20		6.39048	0.001355	31.9524	0.006773		8.23558	0.000611	41.1779	0.003053		9.82086	0.04918	49.1043	0.245901		11.2902	0.177017	56.4511	0.885087		12.3817	0.021311	61.9083	0.106556
			AKSTGEPQGVIRHYVVCSTPQSQY	321	344	21		6.3652	0.02719	30.3105	0.129477		8.06125	0.020979	38.3869	0.099902		10.0231	0.027406	47.7289	0.130503		11.9717	0.036288	57.0079	0.172802		13.1588	0.022602	62.6609	0.107628
			YVVCSTPQSQY	334	344	9		1.67655	0.071208	18.6283	0.791204		2.43219	0.030871	27.0243	0.343013		3.58858	0.110485	39.8731	1.22761		4.79995	0.115676	53.3327	1.28528		5.54545	0.124174	61.6161	1.37972
			YYLAEKHLFSTIPEL	344	358	13		2.25462	0.061145	17.3432	0.470347		3.4913	0.055482	26.8562	0.426786		5.06444	0.056472	38.9572	0.434398		6.34987	0.062932	48.8451	0.48409		6.86361	0.055497	52.797	0.426901
			YLAEKHL	345	351	6		2.00396	0.027978	33.3993	0.466295		3.01159	0.010999	50.1932	0.183321		3.17577	0.053461	52.9295	0.891016		3.10527	0.015215	51.7545	0.253587		3.08178	0.050588	51.363	0.843132
			YLAEKHLFSTIPEL	345	358	12		2.00923	0.028506	16.7436	0.237551		3.10885	0.028506	25.9071	0.237548		4.36168	0.070189	36.3473	0.58491		5.2549	0.101181	43.7909	0.843175		5.75882	0.057032	47.9902	0.475263
			LAEKHLFSTIPEL	346	358	11		1.86278	0.024647	16.9344	0.224065		2.67165	0.016346	24.2877	0.148597		3.96357	0.063284	36.0324	0.575313		4.81514	0.030731	43.774	0.279374		5.24484	0.044418	47.6803	0.403797
			LAEKHLFSTIPELINYHQHNSAG	346	368	21		6.92638	0.01769	32.9828	0.084238		9.00602	0.016687	42.8858	0.079464		10.719	0.113588	51.0429	0.540896		12.5177	0.018351	59.608	0.087385		13.4304	0.029466	63.9542	0.140313
			TIPELINYHQHNSAGLISRLKY	354	375	20		3.11282	0.120251	15.5641	0.601256		4.18494	0.016116	20.9247	0.08058		6.11228	0.115913	30.5614	0.579566		8.4665	0.115773	42.3325	0.578866		9.52719	0.061704	47.636	0.30852
			INYHQHNSAGL	359	369	10		2.50775	0.101123	25.0775	1.01123		2.62852	0.012035	26.2852	0.120355		2.90593	0.02971	29.0593	0.297103		3.55546	0.088544	35.5546	0.885435		3.79493	0.060379	37.9493	0.603792
			NYHQHNSAGL	360	369	9		2.53055	0.063242	28.1172	0.702688		2.56516	0.010486	28.5018	0.116513		2.88997	0.010681	32.1108	0.118675		3.55735	0.10825	39.5261	1.20278		3.80999	0.044522	42.3333	0.494694
			HQHNSAGL	362	369	7		2.82101	0.040816	40.3001	0.583081		2.81182	0.007872	40.1689	0.112455		2.82231	0.065963	40.3188	0.942328		2.86636	0.13809	40.948	1.97272		2.81097	0.051478	40.1567	0.735399
			ISRLKYPVSKQNKNAPSTAGL	370	390	18		8.18342	0.176168	45.4635	0.978711		8.64443	0.013911	48.0246	0.077283		10.3084	0.151484	57.269	0.841576		11.8411	0.015422	65.7838	0.085676		11.7539	0.058344	65.2995	0.324133
			ISRLKYPVSKQNKNAPSTAGLG	370	391	19		9.1765	0.116041	48.2974	0.610741		9.53234	0.049645	50.1702	0.261291		11.1618	0.067511	58.7464	0.355322		12.7089	0.067769	66.8891	0.356677		12.7746	0.055257	67.2348	0.290827
			ISRLKYPVSKQNKNAPSTAGLGYGSW	370	395	23		11.2872	0.141639	49.0748	0.61582		11.8652	0.017824	51.5879	0.077495		13.2763	0.09787	57.7229	0.42552		14.8982	0.06047	64.7748	0.262912		14.8342	0.088926	64.4964	0.386633
			EIDPKDLTF	396	404	7		2.02444	0.048536	28.9206	0.693366		2.31486	0.002364	33.0695	0.033768		3.2605	0.059047	46.5786	0.843524		3.78415	0.071455	54.0592	1.02078		4.22589	0.028497	60.3698	0.407097
			EIDPKDLTFL	396	405	8		1.60123	0.065703	20.0154	0.821292		2.25999	0.046067	28.2499	0.575842		3.21152	0.095791	40.144	1.19738		3.71232	0.124806	46.404	1.56007		4.12894	0.089478	51.6118	1.11847
			FLKELGTGQF	404	413	9		4.68645	0.06155	52.0717	0.683887		5.37486	0.020009	59.7206	0.222325		5.60631	0.083441	62.2923	0.927127		5.79071	0.077311	64.3412	0.859011		5.7672	0.029352	64.08	0.326131
			LKELGTGQF	405	413	8		4.51144	0.043883	56.393	0.54854		5.01291	0.02047	62.6613	0.255877		5.19807	0.027411	64.9759	0.342633		5.20547	0.02237	65.0684	0.27963		5.19853	0.053727	64.9816	0.671588
			LKELGTGQFGVVKYGKWRGQY	405	425	20		5.40566	0.132744	27.0283	0.663722		6.91929	0.015842	34.5965	0.079212		9.73574	0.03298	48.6787	0.164898		11.4198	0.132306	57.0988	0.661531		11.9714	0.034748	59.8568	0.173739
			KELGTGQF	406	413	7		3.52908	0.046511	50.4154	0.664443		3.88403	0.032893	55.4861	0.469897		4.06993	0.0339	58.1419	0.484292		4.08171	0.082285	58.3102	1.1755		4.10999	0.039841	58.7141	0.569163
			GVVKYGKWRGQY	414	425	11		1.50553	0.063336	13.6867	0.575785		2.41344	0.045717	21.9403	0.41561		4.95268	0.051184	45.0244	0.465306		6.94517	0.053335	63.1379	0.484863		7.61042	0.051454	69.1856	0.467763
			GVVKYGKWRGQYDVA	414	428	14		1.61603	0.078751	11.5431	0.562511		2.62104	0.042497	18.7217	0.303553		4.82906	0.062611	34.4933	0.447222		6.67235	0.058953	47.6596	0.421094		7.32403	0.06126	52.3145	0.437575
			VKYGKWRGQY	416	425	9		1.22694	0.055154	13.6327	0.61282		1.95527	0.006447	21.7252	0.071636		3.80218	0.023219	42.2464	0.257984		5.21557	0.064239	57.9507	0.713766		5.88987	0.022255	65.443	0.247281
			IREGSMSE	432	439	7		3.50825	0.134302	50.1179	1.9186		4.17593	0.051808	59.6561	0.740108		4.18057	0.092474	59.7224	1.32105		4.13897	0.085558	59.1281	1.22226		4.23658	0.091145	60.5225	1.30207
			IREGSMSEDE	432	441	9		3.83239	0.06291	42.5821	0.698998		4.65368	0.02151	51.7076	0.239		4.67463	0.09932	51.9403	1.10356		4.65969	0.072357	51.7743	0.803969		4.68445	0.025039	52.0494	0.278213
			IREGSMSEDEF	432	442	10		3.33126	0.102425	33.3126	1.02425		4.2182	0.073554	42.182	0.735544		4.51521	0.10254	45.1521	1.0254		4.75628	0.125654	47.5628	1.25654		4.78189	0.109421	47.819	1.09421
			IEEAKVMMNLSHEKL	443	457	14		1.7204	0.043069	12.2885	0.307638		2.84154	0.034619	20.2967	0.247279		4.62833	0.035056	33.0595	0.250396		6.40278	0.093149	45.7341	0.665348		7.47775	0.054423	53.4125	0.388734
			AKVMMNLSHEKL	446	457	11		0.965492	0.089483	8.7772	0.813478		1.83777	0.050687	16.707	0.460787		3.0611	0.059951	27.8282	0.545009		4.04582	0.140164	36.7802	1.27422		4.85956	0.079812	44.1778	0.725568
			KVMMNLSHEKL	447	457	10		0.955839	0.072746	9.55839	0.727464		1.63007	0.068072	16.3007	0.680716		2.3667	0.06824	23.667	0.682405		3.47056	0.148926	34.7056	1.48926		4.21337	0.117507	42.1337	1.17507
			NLSHEKL	451	457	6		0.740127	0.089108	12.3355	1.48513		1.04177	0.065815	17.3629	1.09692		1.16368	0.091261	19.3947	1.52102		1.3225	0.101316	22.0416	1.68861		1.6953	0.068435	28.2551	1.14059
			YGVCTKQRPIF	461	471	9		1.71256	0.111592	19.0284	1.23991		2.04792	0.048566	22.7546	0.539624		2.40795	0.054687	26.755	0.607639		2.75941	0.079562	30.6601	0.884024		3.3882	0.059396	37.6467	0.659952
			GVCTKQRPIF	462	471	8		1.5709	0.073639	19.6362	0.920482		1.83506	0.024457	22.9382	0.305711		2.16059	0.056677	27.0074	0.708464		2.46181	0.077482	30.7726	0.968524		2.9338	0.051476	36.6725	0.643455
			TKQRPIF	465	471	5		0.911492	0.05299	18.2298	1.05979		1.14811	0.038992	22.9623	0.779836		1.3781	0.086887	27.562	1.73774		1.46886	0.082678	29.3772	1.65355		1.77594	0.047288	35.5188	0.945769
			YMANGCL	476	482	6		1.49384	0.106549	24.8974	1.77581		2.0307	0.085602	33.845	1.42671		2.59353	0.136838	43.2254	2.28063		2.54865	0.104711	42.4774	1.74519		2.51029	0.137968	41.8382	2.29946
			LNYLREMRHRFQTQQL	483	498	15		4.71448	0.177446	31.4299	1.18298		5.67625	0.094046	37.8417	0.626976		6.86961	0.112928	45.7974	0.752853		7.0163	0.107343	46.7753	0.715621		7.32035	0.095923	48.8024	0.639485
			LREMRHRFQTQQL	486	498	12		3.90998	0.166781	32.5832	1.38984		4.54485	0.141702	37.8738	1.18085		5.30487	0.175494	44.2073	1.46245		5.42429	0.154651	45.2025	1.28876		5.4245	0.146466	45.2042	1.22055
			MRHRFQTQQL	489	498	9		2.80777	0.075086	31.1975	0.834287		3.56471	0.067516	39.6079	0.75018		4.00168	0.093051	44.4632	1.03391		4.03746	0.17029	44.8607	1.89211		3.98757	0.108647	44.3063	1.20719
			CKDVCEAM	502	509	7		0.015382	0.072305	0.219745	1.03293		-0.016456	0.046585	-0.235091	0.665506		0.069587	0.049409	0.994099	0.705845		-0.027633	0.098313	-0.394758	1.40447		0.038846	0.046688	0.554942	0.666972
			MEYLESKQFL	509	518	9		0.090147	0.029122	1.00163	0.323577		0.431738	0.01143	4.79709	0.126998		1.52993	0.119182	16.9992	1.32424		2.5657	0.133845	28.5078	1.48717		3.20217	0.011981	35.5797	0.133124
			EYLESKQFL	510	518	8		0.117433	0.085105	1.46791	1.06381		0.460656	0.040603	5.7582	0.507533		1.49912	0.104914	18.739	1.31142		2.53821	0.096434	31.7276	1.20543		3.13751	0.076117	39.2188	0.951467
			YLESKQFL	511	518	7		0.150382	0.109948	2.14832	1.57068		0.495918	0.05753	7.08454	0.821864		1.42665	0.05875	20.3807	0.839279		2.44921	0.081405	34.9887	1.16293		2.96385	0.057536	42.3406	0.821948
			YLESKQFLHRDLAARNCL	511	528	17		0.382467	0.092246	2.2498	0.542621		0.793775	0.017803	4.66926	0.104723		2.51461	0.017803	14.7918	0.104723		3.90475	0.032643	22.9691	0.192015		4.75592	0.024488	27.976	0.144047
			ESKQFLHRDLAARNCL	513	528	15		0.51639	0.053377	3.4426	0.355846		1.07401	0.048701	7.1601	0.324676		2.44557	0.056675	16.3038	0.377835		3.76689	0.085088	25.1126	0.567252		4.31304	0.089661	28.7536	0.597741
			LHRDLAARNC	518	527	9		0.253669	0.108719	2.81854	1.20799		0.357632	0.054616	3.97369	0.60684		1.10158	0.067605	12.2397	0.751169		1.61057	0.060872	17.8952	0.67636		1.87386	0.058189	20.8207	0.646542
			RNCLVNDQGVVKVSDF	525	540	15		1.56177	0.063836	10.4118	0.425574		2.40533	0.04023	16.0355	0.268199		2.94367	0.048722	19.6245	0.324816		3.31465	0.167466	22.0977	1.11644		3.83313	0.040825	25.5542	0.27217
			RNCLVNDQGVVKVSDFGL	525	542	17		1.53684	0.049285	9.04026	0.289914		2.70351	0.008214	15.903	0.048318		4.23441	0.020283	24.9083	0.119314		4.61897	0.010888	27.1704	0.064045		5.0711	0.033012	29.83	0.194187
			CLVNDQGVVKVSD	527	539	12		1.73051	0.039923	14.4209	0.332695		2.47772	0.022274	20.6476	0.18562		2.62312	0.030955	21.8593	0.257961		2.82145	0.030366	23.5121	0.253053		3.32041	0.042284	27.6701	0.352366
			CLVNDQGVVKVSDF	527	540	13		1.55974	0.017372	11.998	0.13363		2.42621	0.014827	18.6632	0.114056		3.04093	0.025013	23.3917	0.192408		3.29438	0.026786	25.3414	0.206047		3.83745	0.037288	29.5188	0.286833
			VNDQGVVKVSD	529	539	10		1.34736	0.053627	13.4736	0.536266		2.14628	0.011454	21.4628	0.114539		2.24328	0.11522	22.4328	1.1522		2.46256	0.061974	24.6256	0.619739		2.86447	0.016095	28.6447	0.160949
			VNDQGVVKVSDF	529	540	11		1.24803	0.092631	11.3457	0.842101		2.01322	0.09114	18.302	0.828543		2.54702	0.114505	23.1547	1.04095		2.89542	0.102671	26.322	0.933376		3.27455	0.091153	29.7686	0.828665
			VNDQGVVKVSDFGL	529	542	13		1.20901	0.086325	9.30009	0.664038		2.36518	0.055737	18.1937	0.428749		3.67238	0.082843	28.2491	0.637256		4.09437	0.099819	31.4951	0.767835		4.42733	0.057262	34.0564	0.440476
			VNDQGVVKVSDFGLSR	529	544	15		2.44434	0.024197	16.2956	0.161315		4.28213	0.009994	28.5475	0.066625		5.84332	0.049945	38.9555	0.332969		6.25481	0.093393	41.6987	0.622619		6.69575	0.01461	44.6383	0.0974
			VNDQGVVKVSDFGLSRY	529	545	16		2.25944	0.096012	14.1215	0.600074		4.24231	0.028371	26.5145	0.177316		6.21068	0.040294	38.8167	0.251837		6.59001	0.137614	41.1876	0.860087		7.02754	0.055608	43.9221	0.347549
			VNDQGVVKVSDFGLSRYVL	529	547	18		2.46413	0.059498	13.6896	0.330544		5.07909	0.01895	28.2172	0.105278		7.68047	0.05511	42.6693	0.306168		8.05275	0.019437	44.7375	0.107983		8.44556	0.061481	46.9198	0.341561
			VNDQGVVKVSDFGLSRYVLDD	529	549	20		3.15937	0.030275	15.7969	0.151377		5.7081	0.022918	28.5405	0.114589		8.42324	0.123114	42.1162	0.615571		8.83433	0.033915	44.1717	0.169575		9.07237	0.029586	45.3618	0.14793
			VNDQGVVKVSDFGLSRYVLDDE	529	550	21		3.43353	0.058427	16.3501	0.278224		6.07244	0.057283	28.9164	0.272774		8.73859	0.110417	41.6124	0.525797		9.15978	0.119698	43.618	0.569989		9.41206	0.064336	44.8193	0.306361
			FGLSRYVL	540	547	7		1.09997	0.030907	15.7138	0.441524		2.55329	0.030481	36.4756	0.435449		4.02449	0.035542	57.4926	0.507736		4.12652	0.031519	58.9503	0.450273		4.13344	0.030513	59.0491	0.435904
			FGLSRYVLDD	540	549	9		1.92928	0.029672	21.4365	0.329685		3.46634	0.018375	38.5149	0.204164		4.92115	0.022989	54.6795	0.255433		4.99608	0.04342	55.512	0.48245		5.11227	0.035083	56.803	0.38981
			FGLSRYVLDDE	540	550	10		2.27551	0.019462	22.7551	0.194618		3.83743	0.017185	38.3743	0.171845		5.36367	0.076221	53.6367	0.762212		5.33891	0.032485	53.3891	0.324853		5.4003	0.033527	54.003	0.335265
			GLSRYVL	541	547	6		1.1589	0.038331	19.315	0.638854		2.5699	0.031292	42.8317	0.521529		3.76716	0.041626	62.786	0.693761		3.83583	0.060442	63.9306	1.00737		3.78019	0.08012	63.0032	1.33533
			GLSRYVLDD	541	549	8		1.91555	0.02713	23.9443	0.339123		3.35259	0.00477	41.9074	0.059627		4.51663	0.039086	56.4579	0.48858		4.56917	0.016176	57.1146	0.202196		4.61734	0.016376	57.7167	0.204706
			GLSRYVLDDE	541	550	9		2.49062	0.070278	27.6736	0.780866		3.97159	0.028404	44.1288	0.315596		5.16443	0.031166	57.3826	0.346287		5.20115	0.035879	57.7905	0.398656		5.2104	0.055675	57.8934	0.618608
			SRYVLDD	543	549	6		1.35821	0.070486	22.6368	1.17477		2.41846	0.023219	40.3077	0.386986		3.44719	0.068448	57.4531	1.1408		3.40789	0.03052	56.7983	0.508671		3.4701	0.024414	57.835	0.406898
			SRYVLDDE	543	550	7		1.59776	0.031297	22.8251	0.447106		2.55847	0.000183	36.5495	0.002621		3.54526	0.082726	50.6466	1.1818		3.63653	0.025926	51.9504	0.370367		3.60757	0.011123	51.5367	0.158905
			EYTSSVGSKF	550	559	9		4.78046	0.024762	53.1162	0.275132		4.95019	0.024436	55.0022	0.271507		4.98856	0.068353	55.4285	0.759483		4.86633	0.024457	54.0703	0.271748		4.8391	0.080665	53.7678	0.896272
			EYTSSVGSKFPVRWSPPEVL	550	569	16		5.01096	0.029778	31.3185	0.18611		5.38235	0.0239	33.6397	0.149375		6.85031	0.02859	42.8144	0.178689		8.69599	0.088639	54.35	0.553995		9.28838	0.041429	58.0524	0.25893
			EYTSSVGSKFPVRWSPPEVLM	550	570	17		5.25332	0.048891	30.9019	0.287597		5.80203	0.011191	34.1296	0.065829		7.70749	0.023756	45.3382	0.139741		9.81231	0.011438	57.7195	0.067282		10.2568	0.037441	60.3338	0.220238
			YTSSVGSKFPVRWSPPEVL	551	569	15		4.68586	0.065056	31.2391	0.433709		5.11737	0.063941	34.1158	0.426271		6.49767	0.069932	43.3178	0.466211		8.35655	0.064277	55.7103	0.428511		8.88929	0.065144	59.2619	0.434294
			YTSSVGSKFPVRWSPPEVLM	551	570	16		4.35096	0.092325	27.1935	0.577031		5.1443	0.033059	32.1519	0.206621		6.84414	0.106812	42.7759	0.667575		8.70036	0.035808	54.3773	0.223799		9.37366	0.045348	58.5854	0.283427
			PVRWSPPEVL	560	569	6		0.551842	0.053076	9.19737	0.884604		0.791871	0.025086	13.1978	0.418095		1.96578	0.049969	32.7631	0.832812		3.63681	0.02676	60.6135	0.446007		4.34021	0.026996	72.3368	0.449937
			MYSKFSSKSDIWA	570	582	12		0.988704	0.029401	8.2392	0.245005		1.83092	0.020855	15.2577	0.173794		2.71047	0.025344	22.5873	0.211203		2.79667	0.076617	23.3056	0.638477		2.93788	0.078795	24.4823	0.656623
			MYSKFSSKSDIWAF	570	583	13		1.03399	0.046651	7.95374	0.35885		1.80808	0.04145	13.9083	0.318849		2.6998	0.161103	20.7677	1.23926		2.62565	0.042251	20.1973	0.325004		2.73957	0.072005	21.0736	0.553887
			YSKFSSKSDIWA	571	582	11		0.912763	0.081747	8.29784	0.743157		1.72581	0.05026	15.6892	0.456908		2.58416	0.11871	23.4924	1.07918		2.7639	0.140302	25.1264	1.27547		2.78245	0.082712	25.295	0.751931
			YSKFSSKSDIWAF	571	583	12		0.843504	0.10329	7.0292	0.860748		1.61206	0.090749	13.4338	0.756241		2.41734	0.095757	20.1445	0.797974		2.60561	0.100448	21.7134	0.837069		2.6014	0.111267	21.6783	0.927225
			SSKSDIWA	575	582	7		0.344693	0.087061	4.92418	1.24373		0.473162	0.070813	6.75945	1.01162		0.988231	0.089184	14.1176	1.27405		1.16939	0.081838	16.7056	1.16912		1.27797	0.073432	18.2567	1.04903
			SSKSDIWAF	575	583	8		0.220094	0.075212	2.75118	0.94015		0.411189	0.034356	5.13986	0.429447		0.794064	0.072584	9.9258	0.907304		0.932392	0.054315	11.6549	0.678934		1.00727	0.035086	12.5909	0.438578
			MWEIYSL	587	593	6		-0.007548	0.080755	-0.1258	1.34592		-0.053845	0.048455	-0.897416	0.807579		0.049229	0.068305	0.820476	1.13841		0.125569	0.049132	2.09282	0.818867		0.452505	0.049685	7.54174	0.828078
			MWEIYSLGKMPYERF	587	601	13		1.51818	0.159781	11.6783	1.22908		2.95076	0.070772	22.6981	0.544401		4.04376	0.083988	31.1058	0.646063		4.90984	0.07503	37.768	0.577155		5.63702	0.071482	43.3617	0.549861
			MWEIYSLGKMPYERFTNSE	587	605	17		2.71466	0.009948	15.9686	0.058518		4.94337	0.000602	29.0787	0.00354		5.99172	0.112522	35.2454	0.661894		6.84375	0.032184	40.2574	0.189317		7.70933	0.084611	45.349	0.497712
			WEIYSLGKM	588	596	8		0.553355	0.024891	6.91693	0.311136		0.644054	0.006171	8.05067	0.07714		1.24052	0.015035	15.5064	0.187941		2.2553	0.136847	28.1913	1.71059		2.97188	0.075888	37.1485	0.9486
			WEIYSLGKMPYE	588	599	10		0.798553	0.044379	7.98553	0.44379		2.01755	0.039302	20.1755	0.39302		2.55454	0.071759	25.5454	0.717592		3.5247	0.057603	35.247	0.57603		4.20557	0.066058	42.0557	0.660579
			WEIYSLGKMPYERF	588	601	12		1.30807	0.060277	10.9005	0.50231		2.6711	0.059588	22.2591	0.496564		3.73969	0.097362	31.1641	0.811352		4.5808	0.159554	38.1734	1.32961		5.42615	0.060066	45.2179	0.500552
			WEIYSLGKMPYERFTNS	588	604	15		2.77984	0.039521	18.5323	0.263476		4.52853	0.035909	30.1902	0.239393		5.69281	0.078763	37.9521	0.525085		6.57097	0.075239	43.8064	0.501595		7.33612	0.061515	48.9075	0.4101
			WEIYSLGKMPYERFTNSE	588	605	16		2.72707	0.075976	17.0442	0.474847		4.69846	0.015007	29.3653	0.093792		5.84345	0.072809	36.5215	0.455055		6.69656	0.067007	41.8535	0.418796		7.48644	0.0479	46.7902	0.299374
			WEIYSLGKMPYERFTNSETAE	588	608	19		2.89885	0.07452	15.2571	0.392211		5.36222	0.057851	28.2222	0.304479		7.85322	0.106813	41.3327	0.562171		8.81319	0.063083	46.3852	0.332017		9.53416	0.077992	50.1798	0.410485
			GKMPYERF	594	601	6		1.50532	0.044942	25.0887	0.749033		2.98294	0.033429	49.7157	0.557148		3.70948	0.090931	61.8247	1.51552		3.69842	0.035276	61.6403	0.58793		3.72849	0.034017	62.1415	0.566954
			GKMPYERFTNSE	594	605	10		2.81263	0.075257	28.1263	0.752571		5.0244	0.020747	50.244	0.207473		5.91833	0.073653	59.1833	0.736534		6.02019	0.056566	60.2019	0.565657		5.97737	0.082197	59.7737	0.821972
			GKMPYERFTNSETAE	594	608	13		2.80465	0.05129	21.5743	0.394537		5.36709	0.050882	41.2853	0.391403		7.56365	0.062339	58.1819	0.479529		7.71963	0.11283	59.3817	0.86792		7.71069	0.072198	59.313	0.555371
			TAEHIAQGLRLPRPHL	606	621	13		3.15701	0.074485	24.2847	0.57296		4.16085	0.049934	32.0065	0.384107		6.36578	0.060101	48.9676	0.462319		7.06572	0.141219	54.3517	1.0863		7.5357	0.053705	57.9669	0.413114
			TAEHIAQGLRLPRPHLAS	606	623	15		3.40865	0.031209	22.7244	0.208061		4.3163	0.01955	28.7753	0.130333		6.6286	0.076641	44.1907	0.510943		7.56269	0.021867	50.418	0.145782		8.20566	0.029526	54.7044	0.196843
			TAEHIAQGLRLPRPHLASE	606	624	16		3.77011	0.051127	23.5632	0.319544		4.86965	0.002169	30.4353	0.013559		6.99805	0.159693	43.7378	0.998081		7.95252	0.104002	49.7033	0.650013		8.6612	0.082262	54.1325	0.514138
			AEHIAQGLRLPRPHLAS	607	623	14		3.39749	0.059341	24.2678	0.423864		4.18408	0.049069	29.8863	0.350496		5.95864	0.069334	42.5617	0.495243		6.8437	0.092404	48.8836	0.660028		7.4388	0.0734	53.1343	0.524282
			HIAQGLRLPRPHL	609	621	10		3.07884	0.07311	30.7884	0.731097		3.78419	0.035795	37.8419	0.35795		4.98154	0.064139	49.8154	0.641395		5.48065	0.035919	54.8065	0.359191		5.84889	0.054829	58.4889	0.548288
			HIAQGLRLPRPHLAS	609	623	12		3.1949	0.075562	26.6242	0.629685		3.87938	0.053346	32.3281	0.444549		5.15192	0.091244	42.9327	0.760366		5.96967	0.053764	49.7472	0.448029		6.56483	0.070843	54.7069	0.590355
			HIAQGLRLPRPHLASE	609	624	13		3.84867	0.028145	29.6051	0.216496		4.51887	0.021218	34.7605	0.163218		5.76135	0.021218	44.3181	0.163218		6.45597	0.022556	49.6613	0.173505		7.13719	0.03053	54.9014	0.234843
			LRLPRPHLAS	614	623	7		2.17282	0.08382	31.0403	1.19743		2.23832	0.046314	31.976	0.661622		2.33182	0.07221	33.3118	1.03157		2.61771	0.046513	37.3959	0.664471		3.33001	0.05186	47.5716	0.740854
			LRLPRPHLASE	614	624	8		2.68659	0.080708	33.5824	1.00885		2.73526	0.015278	34.1908	0.190979		2.84283	0.085555	35.5353	1.06944		3.19477	0.08597	39.9346	1.07462		3.8467	0.024578	48.0838	0.307224
			ERVYTIM	624	630	6		-0.002841	0.053045	-0.047351	0.88409		0.119978	0.02584	1.99963	0.430662		0.726294	0.034984	12.1049	0.583061		1.20929	0.027818	20.1548	0.463636		1.71139	0.031244	28.5232	0.520733
			YSCWHEKADERPSF	631	644	12		1.49668	0.110425	12.4724	0.920207		2.24191	0.098656	18.6826	0.822131		2.95847	0.122233	24.6539	1.0186		3.75026	0.135719	31.2521	1.13099		4.14837	0.103673	34.5697	0.86394
			SCWHEKADERPSF	632	644	11		1.36132	0.086877	12.3756	0.789788		2.0646	0.038676	18.7691	0.351603		2.73027	0.045954	24.8207	0.417765		3.45296	0.101294	31.3905	0.920854		3.89026	0.038956	35.366	0.354147
			WHEKADERPSF	634	644	9		1.51611	0.025639	16.8456	0.284879		2.29907	0.025053	25.5452	0.278368		3.03133	0.050729	33.6814	0.563656		3.94922	0.029313	43.8802	0.325696		4.31543	0.025066	47.9493	0.278508
			HEKADERPSF	635	644	8		1.23722	0.051392	15.4653	0.642395		1.8705	0.020857	23.3812	0.260715		2.50795	0.05689	31.3493	0.711124		3.28807	0.107392	41.1009	1.3424		3.77529	0.022855	47.1911	0.285686
			KILLSNIL	645	652	7		-0.017458	0.026705	-0.249394	0.381505		-0.035313	0.014777	-0.504472	0.211095		0.017508	0.037254	0.250109	0.532203		0.16287	0.026401	2.32671	0.377157		0.566968	0.023519	8.09954	0.335988
			KILLSNILDV	645	654	9		-0.002477	0.058525	-0.027527	0.650273		-0.008053	0.052271	-0.089477	0.580793		0.118798	0.08237	1.31998	0.915226		0.490935	0.059597	5.45484	0.662188		1.53109	0.057426	17.0122	0.638071
			DVMDEESHHHHHH	653	665	12		2.0845	0.076885	17.3708	0.640711		2.4873	0.047192	20.7275	0.393271		2.63958	0.095183	21.9965	0.793191		2.5973	0.108516	21.6441	0.904297		2.69453	0.047373	22.4544	0.394773
			MDEESHHHHHH	655	665	10		1.56345	0.160374	15.6345	1.60374		1.8486	0.020913	18.486	0.209131		1.97081	0.106053	19.7081	1.06053		1.93243	0.094081	19.3243	0.940805		1.97746	0.05116	19.7746	0.511605
			DEESHHHHHH	656	665	9		1.40463	0.08888	15.607	0.987556		1.54925	0.067747	17.2139	0.752742		1.62854	0.081019	18.0949	0.900207		1.6179	0.118502	17.9766	1.31669		1.66716	0.067821	18.524	0.753568
